# Supplementary material for: Evolution of unexpected diversity in a putative mating type locus and its correlation with genome variability reveals likely asexuality in the model mycorrhizal fungus Rhizophagus irregularis
Source: PubMed Central journal article supplement (PMC11414155; doi:10.1186/s12864-024-10770-9), 2024-09-20

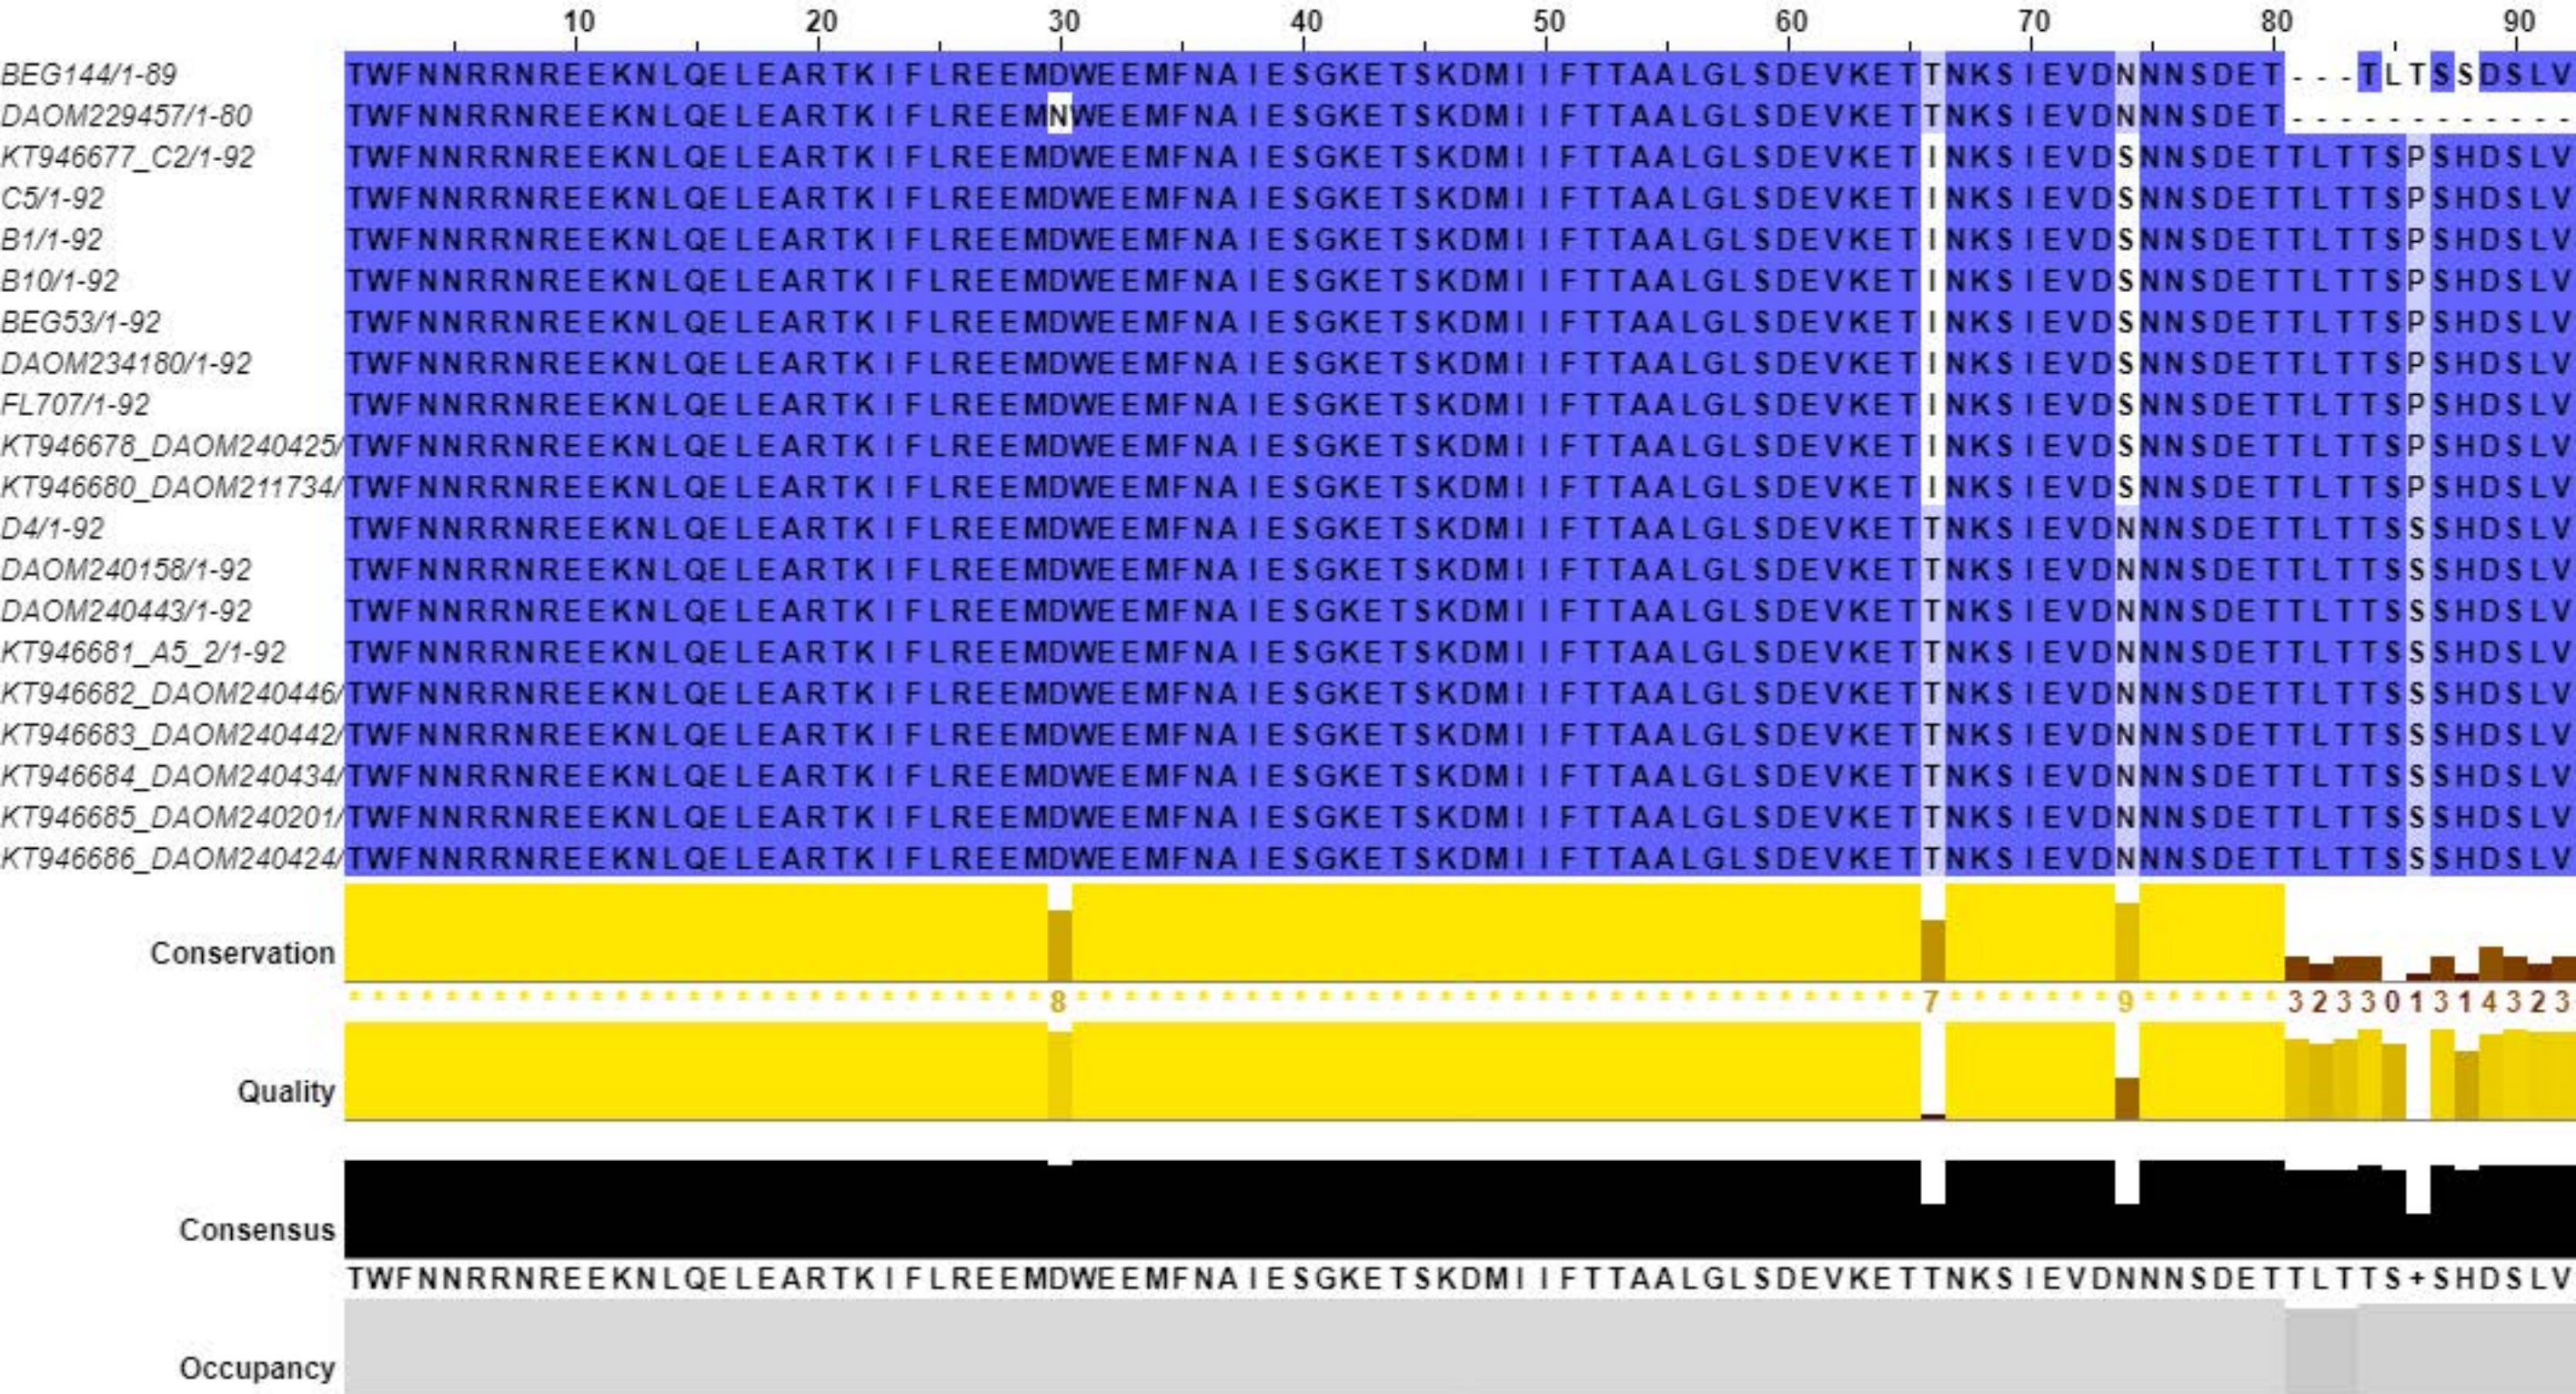

Supplement: 12864_2024_10770_MOESM2_ESM.pdf [file 12864_2024_10770_MOESM2_ESM.pdf]
