# Supplementary material for: Evolution of unexpected diversity in a putative mating type locus and its correlation with genome variability reveals likely asexuality in the model mycorrhizal fungus Rhizophagus irregularis
Source: PubMed Central journal article supplement (PMC11414155; doi:10.1186/s12864-024-10770-9), 2024-09-20
Supplement: 12864_2024_10770_MOESM3_ESM.pdf [file 12864_2024_10770_MOESM3_ESM.pdf]

**a** Phylogeny congruency between Genome and PTG, Baker's gamma distribution

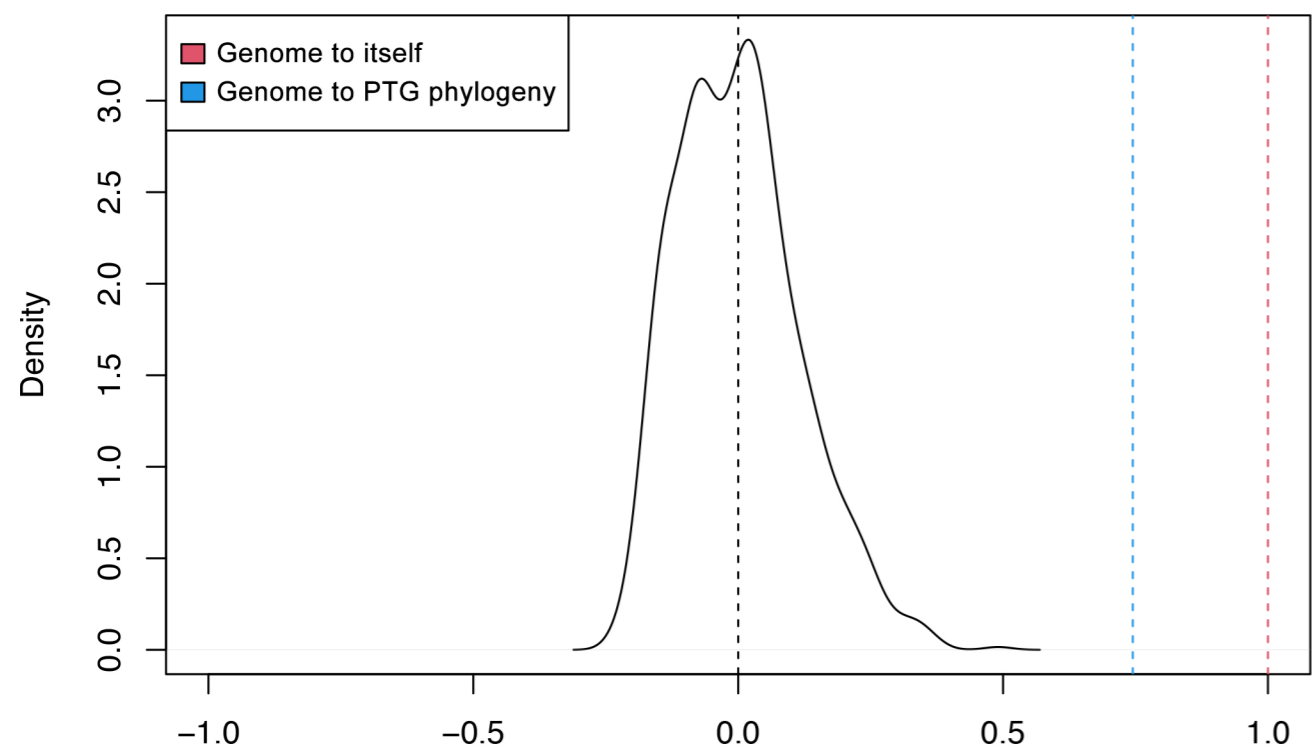

N = 1000 Bandwidth = 0.02619  
p value for congruency significance: to itself = 0 ; to PTG phylogeny tree = 0

**b** Phylogeny congruency between Genome and MAT, Baker's gamma distribution

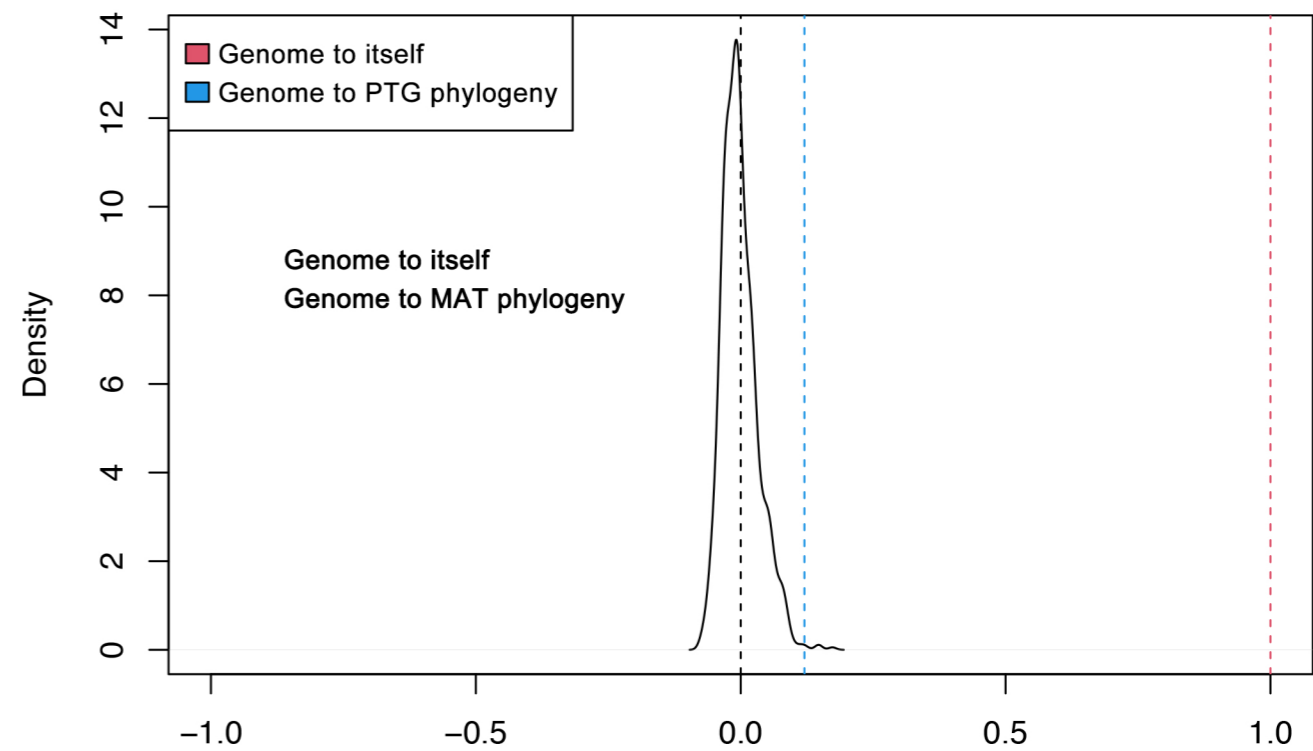

N = 1000 Bandwidth = 0.007129  
p value for congruency significance: to itself = 0 ; to MAT phylogeny tree = 4E-03

**c** Phylogeny congruency between MAT and PTG, Baker's gamma distribution

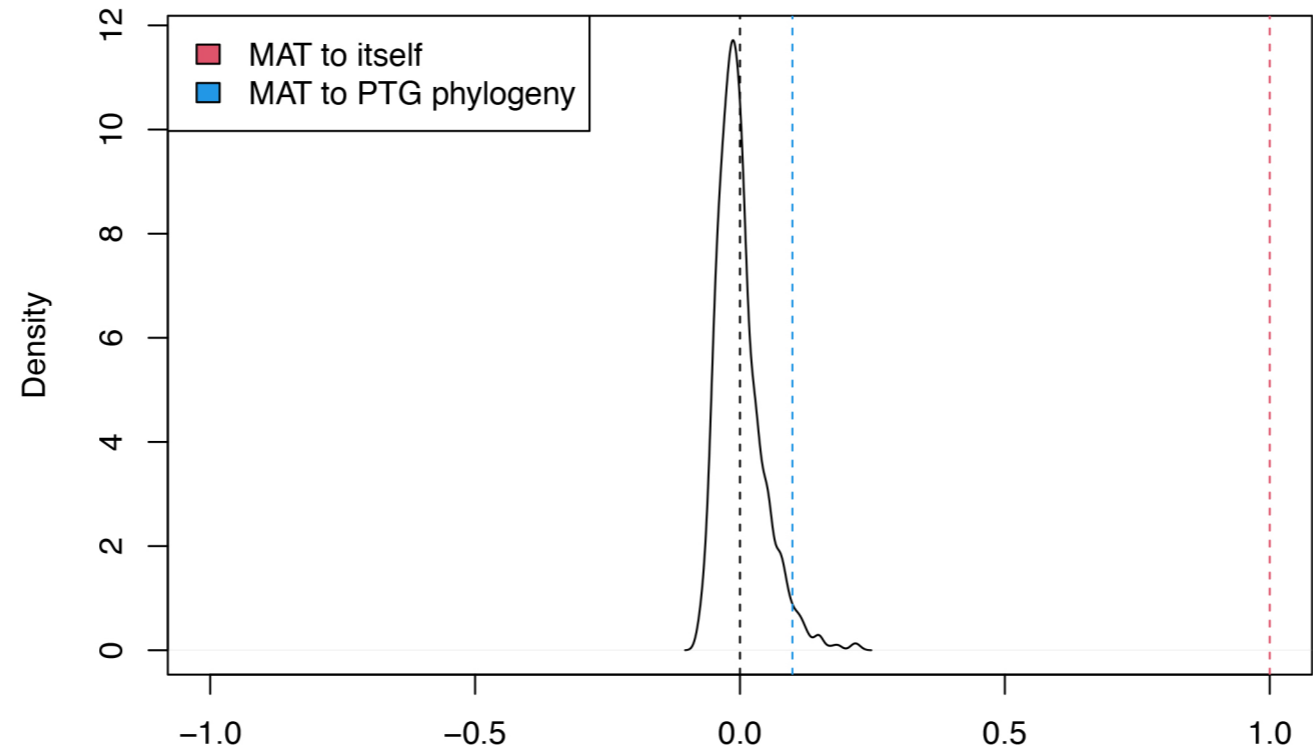

N = 1000 Bandwidth = 0.00843  
p value for congruency significance: to itself = 0 ; to PTG phylogeny tree = 3.2E-02
